# Supplementary material for: Cell metabolomics analyses revealed a role of altered fatty acid oxidation in neurotoxicity pattern difference between nab-paclitaxel and solvent-based paclitaxel
Source: PubMed Central journal article supplement (PMC7978375; doi:10.1371/journal.pone.0248942), 2021-03-19
Supplement: pone.0248942.s001.pdf [file pone.0248942.s001.pdf]

- 1 **S1 Table. Metabolic profiles of undifferentiated SH-SY5Y cells treated with 100 nM of paclitaxel (in dimethyl sulfoxide), Phyxol, or**
- 2 **Abraxane<sup>®a</sup>.**

| Retention time (min) | Metabolite <sup>b</sup> | Fold change (n=3) <sup>c</sup> |                |                | <i>p</i> value <sup>d</sup> |            |            |            |
|----------------------|-------------------------|--------------------------------|----------------|----------------|-----------------------------|------------|------------|------------|
|                      |                         | PTX/CTL<br>(A)                 | PHY/CTL<br>(B) | ABR/CTL<br>(C) | Total                       | A versus B | A versus C | B versus C |
| 0.69                 | 1-Methylhistidine       | 0.97 ± 0.14                    | 1.06 ± 0.12    | 1.04 ± 0.05    | 0.6333                      | 0.6325     | 0.7560     | 0.9740     |
| 0.76                 | Histidine               | 0.91 ± 0.02                    | 0.90 ± 0.06    | 1.00 ± 0.06    | 0.0911                      | 0.9414     | 0.1572     | 0.1028     |
| 0.77                 | Arginine                | 1.24 ± 0.08                    | 0.78 ± 0.01    | 0.62 ± 0.08    | <0.0001***                  | 0.0003***  | <0.0001*** | 0.0344*    |
| 0.80                 | Asparagine              | 0.96 ± 0.05                    | 0.96 ± 0.05    | 0.97 ± 0.10    | 0.9605                      | 0.9930     | 0.9571     | 0.9843     |
| 0.81                 | Alanine                 | 0.78 ± 0.02                    | 0.73 ± 0.09    | 0.81 ± 0.10    | 0.4541                      | 0.7161     | 0.8580     | 0.4286     |
| 0.81                 | Aspartic acid           | 0.97 ± 0.08                    | 0.94 ± 0.11    | 1.04 ± 0.11    | 0.5119                      | 0.8988     | 0.7354     | 0.4899     |

|      |                       |             |             |             |         |        |         |        |
|------|-----------------------|-------------|-------------|-------------|---------|--------|---------|--------|
| 0.82 | Glutamine             | 1.03 ± 0.09 | 0.96 ± 0.20 | 1.01 ± 0.14 | 0.8049  | 0.7980 | 0.9803  | 0.8910 |
| 0.82 | Taurine               | 0.89 ± 0.05 | 0.81 ± 0.09 | 0.74 ± 0.20 | 0.4212  | 0.7329 | 0.3925  | 0.8032 |
| 0.83 | 5-Aminolevulinic acid | 0.86 ± 0.12 | 0.84 ± 0.03 | 0.94 ± 0.09 | 0.3709  | 0.9095 | 0.5655  | 0.3610 |
| 0.83 | Carnitine             | 0.68 ± 0.12 | 0.76 ± 0.09 | 0.94 ± 0.06 | 0.0318* | 0.5246 | 0.0289* | 0.1189 |
| 0.83 | Fructose              | 1.23 ± 0.03 | 1.25 ± 0.19 | 1.03 ± 0.05 | 0.1120  | 0.9756 | 0.1733  | 0.1322 |
| 0.83 | Glycerophosphocholine | 1.16 ± 0.14 | 1.17 ± 0.08 | 1.17 ± 0.17 | 0.9981  | 0.9995 | 0.9979  | 0.9995 |
| 0.83 | Threonine             | 0.93 ± 0.11 | 0.85 ± 0.09 | 0.94 ± 0.10 | 0.5102  | 0.6471 | 0.9687  | 0.5145 |
| 0.84 | 5-Methylcytidine      | 1.16 ± 0.14 | 1.17 ± 0.07 | 1.17 ± 0.17 | 0.9981  | 0.9995 | 0.9979  | 0.9995 |
| 0.84 | Glutamic acid         | 0.82 ± 0.10 | 0.78 ± 0.08 | 0.87 ± 0.17 | 0.6584  | 0.9285 | 0.8401  | 0.6373 |
| 0.84 | Mannitol              | 0.88 ± 0.10 | 0.88 ± 0.10 | 0.90 ± 0.19 | 0.9662  | 0.9995 | 0.9685  | 0.9758 |
| 0.85 | Creatinine            | 1.00 ± 0.12 | 0.92 ± 0.23 | 0.72 ± 0.06 | 0.1570  | 0.7961 | 0.1489  | 0.3360 |

|      |                      |             |             |             |         |         |        |         |
|------|----------------------|-------------|-------------|-------------|---------|---------|--------|---------|
| 0.85 | Orotic acid          | 1.18 ± 0.03 | 1.16 ± 0.13 | 0.92 ± 0.19 | 0.1029  | 0.9878  | 0.1268 | 0.1534  |
| 0.85 | Ribose               | 0.75 ± 0.08 | 0.74 ± 0.06 | 0.83 ± 0.04 | 0.2461  | 0.9608  | 0.3615 | 0.2617  |
| 0.87 | Orotidine            | 0.87 ± 0.13 | 0.77 ± 0.16 | 1.00 ± 0.13 | 0.2191  | 0.6742  | 0.5438 | 0.1970  |
| 0.89 | Creatine             | 1.03 ± 0.04 | 1.09 ± 0.09 | 0.98 ± 0.05 | 0.1964  | 0.5167  | 0.6514 | 0.1756  |
| 0.89 | Ribose 5-phosphate   | 0.86 ± 0.17 | 0.84 ± 0.18 | 1.02 ± 0.10 | 0.3631  | 0.9939  | 0.4508 | 0.4013  |
| 0.90 | Glycerol 3-phosphate | 0.77 ± 0.03 | 0.78 ± 0.11 | 0.96 ± 0.05 | 0.0270* | 0.0367* | 0.9839 | 0.0452* |
| 0.91 | Glycerone phosphate  | 0.80 ± 0.12 | 0.78 ± 0.18 | 0.96 ± 0.05 | 0.2291  | 0.9795  | 0.3219 | 0.2545  |
| 0.98 | Valine               | 0.86 ± 0.13 | 0.98 ± 0.08 | 0.99 ± 0.04 | 0.2488  | 0.3227  | 0.2895 | 0.9955  |
| 1.20 | Malic acid           | 0.70 ± 0.13 | 0.64 ± 0.14 | 0.77 ± 0.07 | 0.4556  | 0.7884  | 0.7884 | 0.4259  |
| 1.20 | Pyruvic acid         | 0.72 ± 0.13 | 0.65 ± 0.13 | 0.77 ± 0.08 | 0.4953  | 0.7555  | 0.8638 | 0.4687  |
| 1.36 | Acetylcarnitine      | 0.71 ± 0.09 | 0.68 ± 0.11 | 0.90 ± 0.02 | 0.0367* | 0.9224  | 0.0703 | 0.0436* |

|      |                       |             |             |             |          |         |         |          |
|------|-----------------------|-------------|-------------|-------------|----------|---------|---------|----------|
| 1.38 | Lactate               | 1.08 ± 0.16 | 1.08 ± 0.13 | 1.00 ± 0.09 | 0.7092   | 0.9977  | 0.7696  | 0.7341   |
| 1.39 | Methionine            | 1.01 ± 0.01 | 0.96 ± 0.17 | 1.01 ± 0.19 | 0.8821   | 0.9012  | 1.0000  | 0.9012   |
| 1.84 | Dopamine              | 0.93 ± 0.06 | 1.05 ± 0.16 | 0.98 ± 0.10 | 0.4864   | 0.4581  | 0.8423  | 0.7681   |
| 1.93 | Isoleucine            | 1.02 ± 0.07 | 1.00 ± 0.14 | 1.00 ± 0.10 | 0.9699   | 0.9711  | 0.9798  | 0.9992   |
| 1.96 | Tyrosine              | 0.96 ± 0.10 | 0.92 ± 0.14 | 1.04 ± 0.08 | 0.4173   | 0.8652  | 0.6659  | 0.3949   |
| 2.16 | Norleucine            | 1.04 ± 0.04 | 0.99 ± 0.07 | 1.05 ± 0.05 | 0.3500   | 0.4785  | 0.9672  | 0.3640   |
| 2.67 | Propionylcarnitine    | 0.76 ± 0.10 | 0.82 ± 0.08 | 1.04 ± 0.12 | 0.0328*  | 0.7678  | 0.0341* | 0.0817   |
| 3.80 | Phenylalanine         | 1.03 ± 0.02 | 0.97 ± 0.05 | 1.01 ± 0.07 | 0.5044   | 0.4815  | 0.8918  | 0.7353   |
| 4.37 | Butyrylcarnitine      | 0.75 ± 0.05 | 0.58 ± 0.04 | 0.89 ± 0.07 | 0.0013** | 0.0200* | 0.0438* | 0.0010** |
| 4.73 | Tryptophan            | 0.98 ± 0.13 | 0.96 ± 0.14 | 1.05 ± 0.09 | 0.5908   | 0.9777  | 0.7106  | 0.5959   |
| 4.85 | 4-Hydroxybenzaldehyde | 0.89 ± 0.05 | 0.86 ± 0.10 | 1.07 ± 0.14 | 0.0856   | 0.9190  | 0.1558  | 0.0943   |

|      |                     |             |             |             |         |        |         |        |
|------|---------------------|-------------|-------------|-------------|---------|--------|---------|--------|
| 4.85 | Homovanillate       | 0.89 ± 0.06 | 0.86 ± 0.10 | 1.07 ± 0.14 | 0.0864  | 0.9349 | 0.1521  | 0.0971 |
| 5.34 | Valerylcarnitine    | 0.66 ± 0.05 | 0.72 ± 0.09 | 0.87 ± 0.02 | 0.0139* | 0.5127 | 0.0132* | 0.0514 |
| 5.43 | Ketoleucine         | 1.08 ± 0.09 | 1.09 ± 0.12 | 1.11 ± 0.10 | 0.9711  | 0.9965 | 0.9693  | 0.9862 |
| 5.81 | 2-Ketohexanoic acid | 1.04 ± 0.12 | 1.09 ± 0.14 | 1.15 ± 0.08 | 0.5644  | 0.8786 | 0.5377  | 0.8098 |

3 <sup>a</sup> ABR, Abraxane<sup>®</sup>; CTL, control; PHY, Phyxol; PTX, paclitaxel; RT, retention time; \*,  $p < 0.05$ ; \*\*,  $p < 0.01$ ; \*\*\*,  $p < 0.001$ .

4 <sup>b</sup> Since isomers could not be distinguished by the present analytical method, the metabolites listed herein were representative.

5 <sup>c</sup> Three independent samples were prepared for each condition in each experiment. Each sample was analyzed twice by ultra-high performance  
6 liquid chromatography-quadrupole time-of-flight mass spectrometry. Three independent experiments were conducted. Data are expressed as  
7 the fold change relative to the control group and are presented as mean ± standard deviation (n = 3).

8 <sup>d</sup> One-way analysis of variance was used to analyze the difference in fold changes; all pairs, Tukey HSD (honestly significant difference) post-  
9 hoc test comparisons were then performed.
