# Supplementary material for: Cell metabolomics analyses revealed a role of altered fatty acid oxidation in neurotoxicity pattern difference between nab-paclitaxel and solvent-based paclitaxel
Source: PubMed Central journal article supplement (PMC7978375; doi:10.1371/journal.pone.0248942), 2021-03-19
Supplement: pone.0248942.s002.pdf [file pone.0248942.s002.pdf]

- 1 **S2 Table. Metabolic profiles of differentiated SH-SY5Y cells treated with 100 nM of paclitaxel (in dimethyl sulfoxide), Phyxol, or**
- 2 **Abraxane<sup>®a</sup>.**

| Retention time (min) | Metabolite <sup>b</sup> | Fold change (n=3) <sup>c</sup> |                |                | <i>p</i> value <sup>d</sup> |            |            |            |
|----------------------|-------------------------|--------------------------------|----------------|----------------|-----------------------------|------------|------------|------------|
|                      |                         | PTX/CTL<br>(A)                 | PHY/CTL<br>(B) | ABR/CTL<br>(C) | Total                       | A versus B | A versus C | B versus C |
| 0.68                 | Guanidine               | 1.07 ± 0.06                    | 1.13 ± 0.15    | 1.33 ± 0.20    | 0.1603                      | 0.8573     | 0.1582     | 0.3080     |
| 0.70                 | Lysine                  | 0.86 ± 0.04                    | 0.91 ± 0.11    | 0.90 ± 0.03    | 0.5995                      | 0.6175     | 0.6945     | 0.9899     |
| 0.70                 | Ornithine               | 0.84 ± 0.05                    | 0.91 ± 0.09    | 0.87 ± 0.02    | 0.4543                      | 0.4277     | 0.8486     | 0.7260     |
| 0.71                 | Cotinine                | 1.02 ± 0.11                    | 1.07 ± 0.24    | 1.05 ± 0.20    | 0.9601                      | 0.9569     | 0.9834     | 0.9934     |
| 0.79                 | Fructose                | 0.97 ± 0.09                    | 1.00 ± 0.14    | 0.93 ± 0.19    | 0.8413                      | 0.9785     | 0.9216     | 0.8321     |
| 0.79                 | Glycine                 | 0.90 ± 0.08                    | 0.85 ± 0.13    | 0.81 ± 0.08    | 0.5470                      | 0.7825     | 0.5218     | 0.8883     |
| 0.80                 | Asparagine              | 0.89 ± 0.13                    | 0.88 ± 0.09    | 0.81 ± 0.06    | 0.5470                      | 0.9952     | 0.5788     | 0.6309     |
| 0.80                 | Serine                  | 0.88 ± 0.06                    | 0.97 ± 0.05    | 0.83 ± 0.08    | 0.0721                      | 0.2133     | 0.6470     | 0.0661     |
| 0.81                 | Alanine                 | 0.91 ± 0.03                    | 0.91 ± 0.02    | 0.89 ± 0.01    | 0.5892                      | 1.0000     | 0.6406     | 0.6436     |

|      |                        |             |             |             |         |        |         |        |
|------|------------------------|-------------|-------------|-------------|---------|--------|---------|--------|
| 0.81 | Aspartic acid          | 0.95 ± 0.04 | 0.95 ± 0.06 | 0.97 ± 0.03 | 0.9025  | 0.9911 | 0.8990  | 0.9468 |
| 0.82 | Glutamine              | 1.11 ± 0.26 | 0.74 ± 0.16 | 0.76 ± 0.13 | 0.1008  | 0.1276 | 0.1463  | 0.9937 |
| 0.82 | Taurine                | 0.94 ± 0.06 | 0.90 ± 0.10 | 0.88 ± 0.09 | 0.6864  | 0.8328 | 0.6716  | 0.9537 |
| 0.83 | 5-Aminolevulinic acid  | 0.92 ± 0.11 | 0.91 ± 0.10 | 0.86 ± 0.05 | 0.6751  | 0.9821 | 0.6779  | 0.7792 |
| 0.83 | Carnitine              | 0.84 ± 0.05 | 0.96 ± 0.07 | 1.02 ± 0.02 | 0.0123* | 0.0659 | 0.0107* | 0.3281 |
| 0.83 | Glycerophosphocholine  | 0.99 ± 0.02 | 1.00 ± 0.01 | 1.00 ± 0.01 | 0.9073  | 0.9621 | 0.8997  | 0.9831 |
| 0.83 | Threonine              | 0.89 ± 0.03 | 0.90 ± 0.10 | 0.88 ± 0.03 | 0.8940  | 0.9872 | 0.9471  | 0.8881 |
| 0.84 | 4,5-Dihydroorotic acid | 1.00 ± 0.11 | 0.93 ± 0.01 | 0.90 ± 0.06 | 0.2766  | 0.5304 | 0.2577  | 0.8073 |
| 0.84 | 5-Methylcytidine       | 0.99 ± 0.02 | 1.00 ± 0.01 | 1.00 ± 0.01 | 0.9073  | 0.9621 | 0.8997  | 0.9831 |
| 0.84 | Glucose 6-phosphate    | 0.93 ± 0.08 | 0.96 ± 0.13 | 0.90 ± 0.13 | 0.8530  | 0.9586 | 0.9539  | 0.8397 |
| 0.84 | Glutamic acid          | 0.98 ± 0.13 | 0.97 ± 0.06 | 0.97 ± 0.05 | 0.9925  | 0.9923 | 0.9959  | 0.9994 |
| 0.84 | Mannitol               | 1.03 ± 0.08 | 1.12 ± 0.12 | 1.16 ± 0.07 | 0.3100  | 0.5239 | 0.2969  | 0.8710 |
| 0.85 | Creatinine             | 1.05 ± 0.05 | 0.94 ± 0.07 | 1.01 ± 0.08 | 0.2006  | 0.1878 | 0.7938  | 0.4163 |
| 0.85 | Orotic acid            | 1.04 ± 0.06 | 0.96 ± 0.11 | 0.94 ± 0.06 | 0.3392  | 0.4915 | 0.3430  | 0.9446 |
| 0.85 | Ribose                 | 1.06 ± 0.04 | 1.06 ± 0.03 | 0.97 ± 0.07 | 0.1014  | 1.0000 | 0.1368  | 0.1372 |

|      |                         |             |             |             |        |        |        |        |
|------|-------------------------|-------------|-------------|-------------|--------|--------|--------|--------|
| 0.87 | Glycolic acid           | 1.02 ± 0.08 | 1.06 ± 0.16 | 1.09 ± 0.10 | 0.7610 | 0.9176 | 0.7414 | 0.9326 |
| 0.89 | 3-Methylindole          | 1.07 ± 0.11 | 0.93 ± 0.11 | 0.92 ± 0.11 | 0.2676 | 0.3521 | 0.3027 | 0.9910 |
| 0.89 | Creatine                | 1.07 ± 0.11 | 0.93 ± 0.11 | 0.92 ± 0.11 | 0.2608 | 0.3454 | 0.2952 | 0.9904 |
| 0.89 | Ribose 5-phosphate      | 0.90 ± 0.12 | 1.00 ± 0.17 | 0.93 ± 0.25 | 0.7993 | 0.7960 | 0.9849 | 0.8788 |
| 0.90 | Glycerol 3-phosphate    | 0.95 ± 0.07 | 1.05 ± 0.18 | 0.98 ± 0.18 | 0.7260 | 0.7208 | 0.9766 | 0.8330 |
| 0.91 | N-Acetylactosamine      | 0.83 ± 0.15 | 0.86 ± 0.12 | 0.84 ± 0.21 | 0.9789 | 0.9771 | 0.9963 | 0.9917 |
| 0.91 | Trimethylamine N-oxide  | 1.02 ± 0.03 | 1.04 ± 0.08 | 1.06 ± 0.07 | 0.7951 | 0.9556 | 0.7792 | 0.9170 |
| 0.95 | Deoxycytidine           | 1.02 ± 0.21 | 0.91 ± 0.19 | 0.94 ± 0.08 | 0.7425 | 0.7340 | 0.8525 | 0.9729 |
| 0.96 | Threitol                | 0.87 ± 0.07 | 0.74 ± 0.13 | 0.89 ± 0.06 | 0.1873 | 0.2775 | 0.9710 | 0.2084 |
| 0.98 | Valine                  | 1.01 ± 0.01 | 0.98 ± 0.02 | 0.99 ± 0.01 | 0.0771 | 0.0694 | 0.2419 | 0.6177 |
| 1.04 | 3-Aminoisobutanoate     | 0.91 ± 0.07 | 1.02 ± 0.12 | 1.03 ± 0.12 | 0.3670 | 0.4644 | 0.3986 | 0.9894 |
| 1.04 | 3-Pyridylacetic acid    | 0.85 ± 0.04 | 1.03 ± 0.06 | 1.06 ± 0.15 | 0.0577 | 0.1088 | 0.0655 | 0.9166 |
| 1.04 | UDP-N-acetylglucosamine | 1.00 ± 0.01 | 1.05 ± 0.04 | 1.05 ± 0.07 | 0.3322 | 0.4269 | 0.3648 | 0.9894 |
| 1.20 | Malic acid              | 1.06 ± 0.03 | 1.11 ± 0.07 | 1.05 ± 0.02 | 0.2496 | 0.4035 | 0.9164 | 0.2508 |
| 1.20 | Pyruvic acid            | 1.03 ± 0.02 | 1.10 ± 0.06 | 1.06 ± 0.03 | 0.1768 | 0.1603 | 0.7045 | 0.4336 |

|      |                            |             |             |             |         |        |         |        |
|------|----------------------------|-------------|-------------|-------------|---------|--------|---------|--------|
| 1.36 | Acetylcarnitine            | 0.83 ± 0.09 | 0.78 ± 0.02 | 0.92 ± 0.04 | 0.0581  | 0.6089 | 0.1855  | 0.0530 |
| 1.38 | Lactate                    | 1.03 ± 0.06 | 0.97 ± 0.05 | 1.01 ± 0.05 | 0.4008  | 0.3796 | 0.8659  | 0.6454 |
| 1.39 | 1-Methyladenine            | 0.96 ± 0.06 | 1.01 ± 0.07 | 1.07 ± 0.12 | 0.4224  | 0.7701 | 0.3928  | 0.7674 |
| 1.39 | Methionine                 | 0.93 ± 0.02 | 0.98 ± 0.06 | 0.96 ± 0.01 | 0.2426  | 0.2213 | 0.5321  | 0.7389 |
| 1.50 | 2-Oxoglutarate             | 1.05 ± 0.02 | 1.12 ± 0.09 | 1.17 ± 0.12 | 0.2953  | 0.6201 | 0.2698  | 0.7391 |
| 1.50 | Citric acid                | 1.05 ± 0.02 | 1.12 ± 0.09 | 1.17 ± 0.12 | 0.2955  | 0.6177 | 0.2701  | 0.7419 |
| 1.50 | Norepinephrine             | 0.96 ± 0.08 | 0.96 ± 0.06 | 0.95 ± 0.06 | 0.9406  | 0.9965 | 0.9646  | 0.9400 |
| 1.54 | Pyroglutamic acid          | 0.74 ± 0.23 | 0.68 ± 0.21 | 0.74 ± 0.28 | 0.9489  | 0.9560 | 0.9999  | 0.9591 |
| 1.55 | Pyrrolidonecarboxylic acid | 0.81 ± 0.23 | 0.74 ± 0.18 | 0.79 ± 0.24 | 0.9276  | 0.9243 | 0.9927  | 0.9622 |
| 1.83 | Fumarate                   | 1.06 ± 0.02 | 0.99 ± 0.03 | 1.03 ± 0.13 | 0.5733  | 0.5462 | 0.8758  | 0.8213 |
| 1.92 | Norspermidine              | 0.89 ± 0.01 | 0.93 ± 0.03 | 0.97 ± 0.05 | 0.0680  | 0.2763 | 0.0589  | 0.4830 |
| 1.93 | Isoleucine                 | 1.00 ± 0.01 | 1.00 ± 0.01 | 1.00 ± 0.01 | 0.6714  | 0.8602 | 0.6489  | 0.9206 |
| 1.96 | Tyrosine                   | 0.94 ± 0.03 | 1.06 ± 0.05 | 1.11 ± 0.07 | 0.0195* | 0.0645 | 0.0188* | 0.5847 |
| 2.16 | Norleucine                 | 1.00 ± 0.01 | 0.99 ± 0.01 | 0.99 ± 0.02 | 0.7860  | 0.9347 | 0.7679  | 0.9333 |
| 2.67 | Propionylcarnitine         | 0.84 ± 0.02 | 0.94 ± 0.12 | 1.02 ± 0.08 | 0.1048  | 0.4284 | 0.0907  | 0.4662 |

|       |                       |             |             |             |         |         |          |        |
|-------|-----------------------|-------------|-------------|-------------|---------|---------|----------|--------|
| 3.48  | Phenylethanolamine    | 1.25 ± 0.24 | 1.21 ± 0.14 | 1.26 ± 0.27 | 0.9501  | 0.9615  | 0.9998   | 0.9557 |
| 3.80  | Phenylalanine         | 1.01 ± 0.01 | 1.01 ± 0.01 | 1.01 ± 0.01 | 0.9952  | 0.9947  | 0.9987   | 0.9986 |
| 4.17  | Thymidine             | 1.03 ± 0.08 | 1.11 ± 0.13 | 1.15 ± 0.04 | 0.2906  | 0.5379  | 0.2722   | 0.8233 |
| 4.73  | Tryptophan            | 0.95 ± 0.02 | 1.00 ± 0.02 | 1.02 ± 0.03 | 0.0294* | 0.1058  | 0.0270*  | 0.5429 |
| 4.74  | 1-Phenylethylamine    | 0.91 ± 0.04 | 1.00 ± 0.01 | 1.11 ± 0.10 | 0.0190* | 0.2401  | 0.0158*  | 0.1448 |
| 4.74  | 3-Methylglutaric acid | 0.91 ± 0.03 | 0.98 ± 0.05 | 1.11 ± 0.07 | 0.0105* | 0.3559  | 0.0094** | 0.0518 |
| 4.84  | γ-Glutamylleucine     | 0.93 ± 0.07 | 1.08 ± 0.04 | 1.07 ± 0.06 | 0.0360* | 0.0447* | 0.0645   | 0.9530 |
| 4.85  | 4-Hydroxybenzaldehyde | 1.03 ± 0.06 | 1.03 ± 0.06 | 1.11 ± 0.05 | 0.2285  | 0.9951  | 0.3004   | 0.2678 |
| 4.85  | Homovanillate         | 1.03 ± 0.06 | 1.03 ± 0.06 | 1.11 ± 0.06 | 0.2451  | 0.9952  | 0.3192   | 0.2852 |
| 5.34  | Valerylcarnitine      | 0.86 ± 0.08 | 0.85 ± 0.11 | 1.00 ± 0.05 | 0.1388  | 0.9921  | 0.1967   | 0.1690 |
| 5.43  | Ketoleucine           | 1.03 ± 0.10 | 0.95 ± 0.08 | 1.04 ± 0.05 | 0.3799  | 0.5057  | 0.9719   | 0.3951 |
| 6.93  | Indolelactic acid     | 1.04 ± 0.04 | 1.08 ± 0.08 | 1.08 ± 0.05 | 0.6910  | 0.7397  | 0.7297   | 0.9998 |
| 12.35 | Hexadecanoylcarnitine | 0.99 ± 0.03 | 1.13 ± 0.07 | 1.07 ± 0.09 | 0.1090  | 0.0950  | 0.3889   | 0.5299 |

3 <sup>a</sup> ABR, Abraxane<sup>®</sup>; CTL, control; PHY, Phyxol; PTX, paclitaxel; RT, retention time; \*,  $p < 0.05$ ; \*\*,  $p < 0.01$ .

4 <sup>b</sup> Since isomers could not be distinguished by the present analytical method, the metabolites listed herein were representative.

5 <sup>c</sup> Three independent samples were prepared for each condition in each experiment. Each sample was analyzed twice by ultra-high performance  
6 liquid chromatography-quadrupole time-of-flight mass spectrometry. Three independent experiments were conducted. Data are expressed as  
7 the fold change relative to the control group and are presented as mean  $\pm$  standard deviation (n = 3).

8 <sup>d</sup> One-way analysis of variance was used to analyze the difference in fold changes; all pairs, Tukey HSD (honestly significant difference) post-  
9 hoc test comparisons were then performed.
