# Supplementary material for: Cell metabolomics analyses revealed a role of altered fatty acid oxidation in neurotoxicity pattern difference between nab-paclitaxel and solvent-based paclitaxel
Source: PubMed Central journal article supplement (PMC7978375; doi:10.1371/journal.pone.0248942), 2021-03-19
Supplement: pone.0248942.s003.pdf [file pone.0248942.s003.pdf]

1 **Original images for Fig 4.**

2 The representative Western blot image shown in Fig 4A (results for three of the six  
3 independent samples for each condition)

4 Medium-chain acyl-CoA dehydrogenase (MCAD)

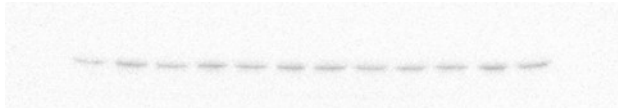

5  
6 From left to right: Control, Control, Control, Paclitaxel, Paclitaxel, Paclitaxel, Phyxol,  
7 Phyxol, Phyxol, Abraxane<sup>®</sup>, Abraxane<sup>®</sup>, Abraxane<sup>®</sup>

8

9 Cyclophilin A

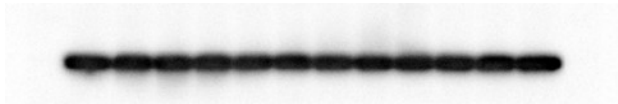

10

11 From left to right: Control, Control, Control, Paclitaxel, Paclitaxel, Paclitaxel, Phyxol,  
12 Phyxol, Phyxol, Abraxane<sup>®</sup>, Abraxane<sup>®</sup>, Abraxane<sup>®</sup>

13

14 The other Western blot image (results for three of the six independent samples for  
15 each condition)

16 Medium-chain acyl-CoA dehydrogenase (MCAD)

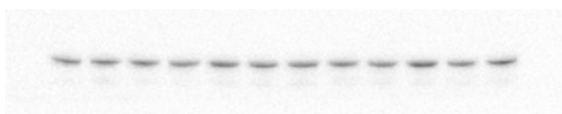

17

18 From left to right: Control, Control, Control, Paclitaxel, Paclitaxel, Paclitaxel, Phyxol,

19 Phyxol, Phyxol, Abraxane<sup>®</sup>, Abraxane<sup>®</sup>, Abraxane<sup>®</sup>

20

21 Cyclophilin A

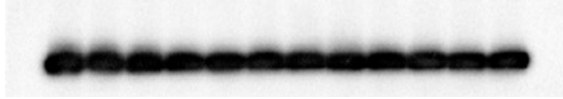

22

23 From left to right: Control, Control, Control, Paclitaxel, Paclitaxel, Paclitaxel, Phyxol,

24 Phyxol, Phyxol, Abraxane<sup>®</sup>, Abraxane<sup>®</sup>, Abraxane<sup>®</sup>

25

26 The representative Western blot image shown in Fig 4B (results for three of the six  
27 independent samples for each condition)

28 Medium-chain acyl-CoA dehydrogenase (MCAD)

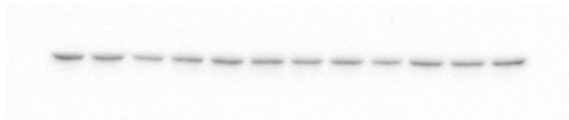

29

30 From left to right: Control, Control, Control, Paclitaxel, Paclitaxel, Paclitaxel, Phyxol,  
31 Phyxol, Phyxol, Abraxane<sup>®</sup>, Abraxane<sup>®</sup>, Abraxane<sup>®</sup>

32

33 Cyclophilin A

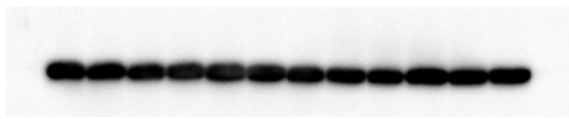

34

35 From left to right: Control, Control, Control, Paclitaxel, Paclitaxel, Paclitaxel, Phyxol,  
36 Phyxol, Phyxol, Abraxane<sup>®</sup>, Abraxane<sup>®</sup>, Abraxane<sup>®</sup>

37

38 The other Western blot image (results for three of the six independent samples for  
39 each condition)

40 Medium-chain acyl-CoA dehydrogenase (MCAD)

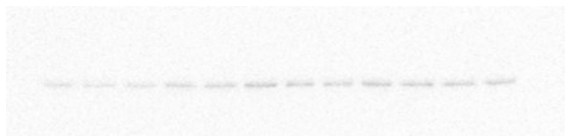

41

42 From left to right: Control, Control, Control, Paclitaxel, Paclitaxel, Paclitaxel, Phyxol,  
43 Phyxol, Phyxol, Abraxane<sup>®</sup>, Abraxane<sup>®</sup>, Abraxane<sup>®</sup>

44

45 Cyclophilin A

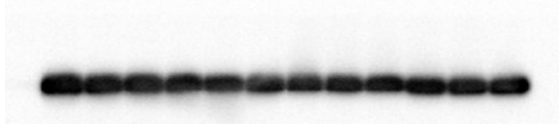

46

47 From left to right: Control, Control, Control, Paclitaxel, Paclitaxel, Paclitaxel, Phyxol,

48 Phyxol, Phyxol, Abraxane<sup>®</sup>, Abraxane<sup>®</sup>, Abraxane<sup>®</sup>
