# Supplementary material for: Cell metabolomics analyses revealed a role of altered fatty acid oxidation in neurotoxicity pattern difference between nab-paclitaxel and solvent-based paclitaxel
Source: PubMed Central journal article supplement (PMC7978375; doi:10.1371/journal.pone.0248942), 2021-03-19
Supplement: pone.0248942.s004.pdf [file pone.0248942.s004.pdf]

1

**Details regarding experimental procedures. Data for figures.**

## 2 **Materials and methods**

### 3 **Additional information for SH-SY5Y cells**

4 Passage numbers: 10-15

5 The date for obtaining the cells from Prof. Ming-Fu Chang's laboratory: August 22,  
6 2018

7

### 8 **Concentration normalization for mass spectrometry analyses of metabolic** 9 **profiles**

10 In order to conduct concentration normalization, an Agilent 1290 UHPLC system  
11 (ultra-high performance liquid chromatography) (Agilent Technologies, Santa Clara,  
12 CA, USA) coupled to an Agilent 6460 QqQ (triple quadrupole) mass spectrometry  
13 (Agilent Technologies, Santa Clara, CA, USA) was utilized. The procedure was  
14 similar to that previously described by Chen et al. [1] with necessary adjustments. A  
15 sample of 2  $\mu\text{L}$  was injected into electrospray ionization mass spectrometry to conduct  
16 flow injection analysis. The ion suppression indicator (ISI), hexakis(2,2,3,3-  
17 tetrafluoropropoxy)phosphazene, was spiked in the blank solution and the cell  
18 extracts. The mobile phase consisted of a 1:1 mixture of water/0.1% formic acid and  
19 acetonitrile/0.1% formic acid. The flow rate was  $200 \mu\text{L min}^{-1}$ . For sample ionization,  
20 a Jet Stream electrospray ionization source was applied. The mass spectrometer

21 parameters were as follows: 100°C gas temperature, 3 L min<sup>-1</sup> gas flow, 10 psi  
22 nebulizer pressure, 150°C sheath gas temperature, 3 L min<sup>-1</sup> sheath gas flow, 4 kV  
23 capillary voltage in the positive ion mode, and 120 V fragmentation voltage. The  
24 calibration curve was established by signal reduction (the extent of ISI in blank  
25 solution subtracted by that in cell samples) and dilution factors of the cell samples.

26

### 27 **Concentration normalization for mass spectrometry analyses of long-chain and** 28 **very long-chain fatty acids**

29 For concentration normalization, an Agilent 1290 UHPLC system coupled to an  
30 Agilent 6460 QqQ mass spectrometry was utilized. The procedure was similar to that  
31 previously described by Chao et al. [2] with necessary adjustments. A sample of 2 µL  
32 was injected into electrospray ionization mass spectrometry to conduct flow injection  
33 analysis. The mobile phase consisted of a mixture of solvent A and solvent B (1:1).  
34 The former contained 40% acetonitrile, 0.1% formic acid, 10 mM ammonium acetate  
35 while the latter was a mixture of isopropanol:acetonitrile (9:1), 0.1% formic acid, 10  
36 mM ammonium acetate. The flow rate was 200 µL min<sup>-1</sup>. A Jet Stream electrospray  
37 ionization source was applied for sample ionization. The mass spectrometer  
38 parameters were as follows: 350°C gas temperature, 10 L min<sup>-1</sup> gas flow, 40 psi  
39 nebulizer pressure, 350°C sheath gas temperature, 11 L min<sup>-1</sup> sheath gas flow, 4 kV

40 capillary voltage in the positive ion mode, and 120 V fragmentation voltage. The  
41 calibration curve was established by the dilution factors of the cell samples and the  
42 reciprocal of the total ion chromatogram area in the precursor ion scan of m/z 184.

43

#### 44 **References**

- 45 1. Chen GY, Liao HW, Tsai IL, Tseng YJ, Kuo CH. Using the matrix-induced ion  
46 suppression method for concentration normalization in cellular metabolomics studies.  
47 Anal Chem. 2015;87:9731-9739.
- 48 2. Chao HC, Chen GY, Hsu LC, Liao HW, Yang SY, Wang SY, et al. Using precursor  
49 ion scan of 184 with liquid chromatography-electrospray ionization-tandem mass  
50 spectrometry for concentration normalization in cellular lipidomic studies. Anal Chim  
51 Acta. 2017;971:68-77.

52 **Data for Fig 1**

53 **(A)**

54 Cell viability (% of control cell growth) of undifferentiated SH-SY5Y cells treated  
55 with 100 nM of paclitaxel, Phyxol, or Abraxane<sup>®</sup> for 24 hours assessed by the  
56 sulforhodamine B (SRB) assay.

57

| Paclitaxel (Experiments 1-3) | Phyxol (Experiments 1-3) | Abraxane <sup>®</sup> (Experiments 1-3) |
|------------------------------|--------------------------|-----------------------------------------|
| 87.3                         | 79.6                     | 87.7                                    |
| 75.4                         | 75.1                     | 69.3                                    |
| 76.5                         | 71.9                     | 83.3                                    |

58  $F(2,6) = 0.3881; p = 0.6942$

59

60 **(B)**

61 Cell viability (% of control cell growth) of differentiated SH-SY5Y cells treated with  
62 100 nM of paclitaxel, Phyxol, or Abraxane<sup>®</sup> for 24 hours assessed by the  
63 sulforhodamine B (SRB) assay.

64

| Paclitaxel (Experiments 1-3) | Phyxol (Experiments 1-3) | Abraxane <sup>®</sup> (Experiments 1-3) |
|------------------------------|--------------------------|-----------------------------------------|
| 96.5                         | 101.6                    | 97.5                                    |
| 100.2                        | 102.0                    | 102.4                                   |
| 98.9                         | 96.0                     | 100.0                                   |

65  $F(2,6) = 0.2668; p = 0.7744$

66

67 **Data for Fig 2**

68 **(A)**

69 Fold changes relative to the control group in the levels of carnitine and acylcarnitines  
 70 of undifferentiated SH-SY5Y cells treated with 100 nM of paclitaxel (in dimethyl  
 71 sulfoxide), Phyxol, or Abraxane<sup>®</sup> for 24 hours.

72

|                                               | Paclitaxel   |              |              |
|-----------------------------------------------|--------------|--------------|--------------|
|                                               | Experiment 1 | Experiment 2 | Experiment 3 |
| Carnitine                                     | 0.571        | 0.684        | 0.632        |
| Acetylcarnitine                               | 0.609        | 0.518        | 0.648        |
| Propionylcarnitine                            | 0.781        | 0.783        | 0.741        |
| Iso-/Butyrylcarnitine                         | 0.648        | 0.758        | 0.720        |
| Isovaleryl-/2-Methylbutyryl-/Valerylcarnitine | 0.586        | 0.603        | 0.661        |
| Tiglylcarnitine                               | 0.567        | 0.658        | 0.681        |
| Hexanoylcarnitine                             | 0.682        | 0.685        | 0.633        |
| Octanoylcarnitine                             | 0.677        | 0.809        | 0.968        |
| Decanoylcarnitine                             | 0.808        | 0.822        | 0.841        |
| Tetradecanoylcarnitine                        | 0.625        | 0.779        | 0.750        |
| Tetradecenoylcarnitine                        | 0.616        | 0.687        | 0.821        |
| Hexadecanoylcarnitine                         | 0.715        | 0.849        | 0.981        |
| Hexadecenoylcarnitine                         | 0.710        | 0.843        | 0.875        |
| Stearoylcarnitine                             | 0.545        | 0.812        | 0.870        |
| Oleoylcarnitine                               | 0.804        | 1.125        | 0.968        |
|                                               | Phyxol       |              |              |
|                                               | Experiment 1 | Experiment 2 | Experiment 3 |
| Carnitine                                     | 0.567        | 0.461        | 0.604        |
| Acetylcarnitine                               | 0.607        | 0.645        | 0.688        |
| Propionylcarnitine                            | 0.556        | 0.708        | 0.893        |
| Iso-/Butyrylcarnitine                         | 0.550        | 0.659        | 0.751        |

|                                               |              |                       |              |
|-----------------------------------------------|--------------|-----------------------|--------------|
| Isovaleryl-/2-Methylbutyryl-/Valerylcarnitine | 0.580        | 0.611                 | 0.752        |
| Tiglylcarnitine                               | 0.516        | 0.600                 | 0.881        |
| Hexanoylcarnitine                             | 0.462        | 0.544                 | 0.651        |
| Octanoylcarnitine                             | 3.160        | 2.365                 | 2.807        |
| Decanoylcarnitine                             | 0.663        | 0.758                 | 0.476        |
| Tetradecanoylcarnitine                        | 0.627        | 0.665                 | 0.837        |
| Tetradecenoylcarnitine                        | 0.638        | 0.714                 | 0.851        |
| Hexadecanoylcarnitine                         | 0.853        | 0.969                 | 0.959        |
| Hexadecenoylcarnitine                         | 0.830        | 0.853                 | 0.999        |
| Stearoylcarnitine                             | 0.834        | 0.803                 | 0.908        |
| Oleoylcarnitine                               | 1.022        | 1.055                 | 1.051        |
|                                               |              | Abraxane <sup>®</sup> |              |
|                                               | Experiment 1 | Experiment 2          | Experiment 3 |
| Carnitine                                     | 0.835        | 0.794                 | 0.797        |
| Acetylcarnitine                               | 0.892        | 0.832                 | 0.811        |
| Propionylcarnitine                            | 1.065        | 1.056                 | 1.064        |
| Iso-/Butyrylcarnitine                         | 0.881        | 0.852                 | 0.909        |
| Isovaleryl-/2-Methylbutyryl-/Valerylcarnitine | 0.887        | 0.801                 | 0.951        |
| Tiglylcarnitine                               | 0.842        | 0.827                 | 0.954        |
| Hexanoylcarnitine                             | 0.978        | 0.867                 | 1.025        |
| Octanoylcarnitine                             | 1.055        | 1.142                 | 1.114        |
| Decanoylcarnitine                             | 0.976        | 1.040                 | 1.275        |
| Tetradecanoylcarnitine                        | 0.923        | 0.930                 | 0.932        |
| Tetradecenoylcarnitine                        | 0.915        | 0.964                 | 1.096        |
| Hexadecanoylcarnitine                         | 1.174        | 1.166                 | 1.106        |
| Hexadecenoylcarnitine                         | 1.101        | 1.037                 | 1.067        |
| Stearoylcarnitine                             | 1.009        | 1.059                 | 1.127        |
| Oleoylcarnitine                               | 1.324        | 1.294                 | 1.252        |

73

74 **Carnitine**

75  $F(2,6) = 17.7333; p = 0.0030$

|            |                       | <i>p</i> value |
|------------|-----------------------|----------------|
| Paclitaxel | Phyxol                | 0.2264         |
| Paclitaxel | Abraxane <sup>®</sup> | 0.0175         |
| Phyxol     | Abraxane <sup>®</sup> | 0.0027         |

76

77 **Acetylcarnitine**

78  $F(2,6) = 20.3823; p = 0.0021$

|            |                       | <i>p</i> value |
|------------|-----------------------|----------------|
| Paclitaxel | Phyxol                | 0.4355         |
| Paclitaxel | Abraxane <sup>®</sup> | 0.0022         |
| Phyxol     | Abraxane <sup>®</sup> | 0.0075         |

79

80 **Propionylcarnitine**

81  $F(2,6) = 10.5978; p = 0.0107$

|            |                       | <i>p</i> value |
|------------|-----------------------|----------------|
| Paclitaxel | Phyxol                | 0.8208         |
| Paclitaxel | Abraxane <sup>®</sup> | 0.0250         |
| Phyxol     | Abraxane <sup>®</sup> | 0.0126         |

82

83 **Iso-/Butyrylcarnitine**

84  $F(2,6) = 9.0577; p = 0.0154$

|            |                       | <i>p</i> value |
|------------|-----------------------|----------------|
| Paclitaxel | Phyxol                | 0.6095         |
| Paclitaxel | Abraxane <sup>®</sup> | 0.0487         |
| Phyxol     | Abraxane <sup>®</sup> | 0.0153         |

85

86 **Isovaleryl-/2-Methylbutyryl-/Valerylcarnitine**



87  $F(2,6) = 11.8736; p = 0.0082$

|            |                       | <i>p</i> value |
|------------|-----------------------|----------------|
| Paclitaxel | Phyxol                | 0.8605         |
| Paclitaxel | Abraxane <sup>®</sup> | 0.0102         |
| Phyxol     | Abraxane <sup>®</sup> | 0.0181         |

88

89 **Tiglylcarnitine**

90  $F(2,6) = 3.3891; p = 0.1035$

91

92 **Hexanoylcarnitine**

93  $F(2,6) = 23.9058; p = 0.0014$

|            |                       | <i>p</i> value |
|------------|-----------------------|----------------|
| Paclitaxel | Phyxol                | 0.2204         |
| Paclitaxel | Abraxane <sup>®</sup> | 0.0071         |
| Phyxol     | Abraxane <sup>®</sup> | 0.0013         |

94

95 **Octanoylcarnitine**

96  $F(2,6) = 55.4092; p = 0.0001$

|            |                       | <i>p</i> value |
|------------|-----------------------|----------------|
| Paclitaxel | Phyxol                | 0.0002         |
| Paclitaxel | Abraxane <sup>®</sup> | 0.3899         |
| Phyxol     | Abraxane <sup>®</sup> | 0.0004         |

97

98 **Decanoylcarnitine**

99  $F(2,6) = 10.7925; p = 0.0103$

|            |                       | <i>p</i> value |
|------------|-----------------------|----------------|
| Paclitaxel | Phyxol                | 0.2182         |
| Paclitaxel | Abraxane <sup>®</sup> | 0.0772         |
| Phyxol     | Abraxane <sup>®</sup> | 0.0086         |

100

101 **Tetradecanoylcarnitine**

102  $F(2,6) = 7.1601; p = 0.0257$

|            |                       | <i>p</i> value |
|------------|-----------------------|----------------|
| Paclitaxel | Phyxol                | 0.9919         |
| Paclitaxel | Abraxane <sup>®</sup> | 0.0418         |
| Phyxol     | Abraxane <sup>®</sup> | 0.0361         |

103

104 **Tetradecenoylcarnitine**

105  $F(2,6) = 7.0395; p = 0.0267$

|            |                       | <i>p</i> value |
|------------|-----------------------|----------------|
| Paclitaxel | Phyxol                | 0.9479         |
| Paclitaxel | Abraxane <sup>®</sup> | 0.0337         |
| Phyxol     | Abraxane <sup>®</sup> | 0.0492         |

106

107 **Hexadecanoylcarnitine**

108  $F(2,6) = 9.4056; p = 0.0141$

|            |                       | <i>p</i> value |
|------------|-----------------------|----------------|
| Paclitaxel | Phyxol                | 0.5503         |
| Paclitaxel | Abraxane <sup>®</sup> | 0.0137         |
| Phyxol     | Abraxane <sup>®</sup> | 0.0489         |

109

110 **Hexadecenoylcarnitine**

111  $F(2,6) = 9.2002; p = 0.0149$

|            |                       | <i>p</i> value |
|------------|-----------------------|----------------|
| Paclitaxel | Phyxol                | 0.4081         |
| Paclitaxel | Abraxane <sup>®</sup> | 0.0133         |
| Phyxol     | Abraxane <sup>®</sup> | 0.0674         |

112

113 **Stearoylcarnitine**

114  $F(2,6) = 6.6749; p = 0.0298$

|            |                       | <i>p</i> value |
|------------|-----------------------|----------------|
| Paclitaxel | Phyxol                | 0.5070         |
| Paclitaxel | Abraxane <sup>®</sup> | 0.0269         |
| Phyxol     | Abraxane <sup>®</sup> | 0.1150         |

115

116 **Oleoylcarnitine**

117  $F(2,6) = 9.4090; p = 0.0141$

|            |                       | <i>p</i> value |
|------------|-----------------------|----------------|
| Paclitaxel | Phyxol                | 0.6149         |
| Paclitaxel | Abraxane <sup>®</sup> | 0.0142         |
| Phyxol     | Abraxane <sup>®</sup> | 0.0441         |

118

119 **(B)**

120 Fold changes relative to the control group in the levels of carnitine and acylcarnitines

121 of differentiated SH-SY5Y cells treated with 100 nM of paclitaxel (in dimethyl

122 sulfoxide), Phyxol, or Abraxane<sup>®</sup> for 24 hours.

123

|                                               | Paclitaxel   |              |              |
|-----------------------------------------------|--------------|--------------|--------------|
|                                               | Experiment 1 | Experiment 2 | Experiment 3 |
| Carnitine                                     | 0.865        | 0.912        | 0.954        |
| Acetylcarnitine                               | 0.707        | 0.705        | 0.787        |
| Propionylcarnitine                            | 0.917        | 1.025        | 0.869        |
| Iso-/Butyrylcarnitine                         | 0.912        | 0.945        | 0.914        |
| Isovaleryl-/2-Methylbutyryl-/Valerylcarnitine | 0.817        | 0.880        | 0.829        |
| Tiglylcarnitine                               | 0.856        | 0.966        | 0.968        |
| Hexanoylcarnitine                             | 0.917        | 0.860        | 0.919        |
| Octanoylcarnitine                             | 0.888        | 0.763        | 1.007        |
| Decanoylcarnitine                             | 0.912        | 1.068        | 0.884        |
| Dodecanoylcarnitine                           | 1.092        | 1.137        | 0.890        |
| Tetradecanoylcarnitine                        | 0.829        | 1.037        | 0.905        |
| Tetradecenoylcarnitine                        | 0.992        | 1.012        | 0.864        |
| Hexadecanoylcarnitine                         | 0.722        | 0.894        | 0.820        |
| Hexadecenoylcarnitine                         | 0.829        | 0.958        | 0.854        |
| Stearoylcarnitine                             | 0.529        | 0.529        | 0.530        |
| Oleoylcarnitine                               | 0.743        | 0.839        | 0.742        |
|                                               | Phyxol       |              |              |
|                                               | Experiment 1 | Experiment 2 | Experiment 3 |
| Carnitine                                     | 0.994        | 1.198        | 0.993        |
| Acetylcarnitine                               | 0.793        | 0.843        | 0.992        |
| Propionylcarnitine                            | 1.120        | 1.001        | 0.888        |
| Iso-/Butyrylcarnitine                         | 0.943        | 1.018        | 0.873        |
| Isovaleryl-/2-Methylbutyryl-/Valerylcarnitine | 0.926        | 1.024        | 0.846        |
| Tiglylcarnitine                               | 0.916        | 1.070        | 0.973        |
| Hexanoylcarnitine                             | 1.038        | 1.050        | 1.043        |
| Octanoylcarnitine                             | 2.933        | 2.298        | 3.333        |
| Decanoylcarnitine                             | 0.769        | 1.025        | 1.036        |
| Dodecanoylcarnitine                           | 0.906        | 1.245        | 0.932        |
| Tetradecanoylcarnitine                        | 0.963        | 1.099        | 0.907        |
| Tetradecenoylcarnitine                        | 1.011        | 1.110        | 0.926        |
| Hexadecanoylcarnitine                         | 0.953        | 1.032        | 0.923        |

|                                               |              |                       |              |
|-----------------------------------------------|--------------|-----------------------|--------------|
| Hexadecenoylcarnitine                         | 0.959        | 1.080                 | 0.954        |
| Stearoylcarnitine                             | 0.769        | 0.715                 | 0.747        |
| Oleoylcarnitine                               | 0.947        | 1.050                 | 0.873        |
|                                               |              | Abraxane <sup>®</sup> |              |
|                                               | Experiment 1 | Experiment 2          | Experiment 3 |
| Carnitine                                     | 1.095        | 1.087                 | 1.104        |
| Acetylcarnitine                               | 1.007        | 0.874                 | 1.119        |
| Propionylcarnitine                            | 1.237        | 1.122                 | 1.134        |
| Iso-/Butyrylcarnitine                         | 1.085        | 1.095                 | 1.093        |
| Isovaleryl-/2-Methylbutyryl-/Valerylcarnitine | 1.061        | 1.109                 | 1.080        |
| Tiglylcarnitine                               | 1.100        | 1.111                 | 1.105        |
| Hexanoylcarnitine                             | 1.100        | 0.968                 | 1.054        |
| Octanoylcarnitine                             | 1.203        | 0.841                 | 1.245        |
| Decanoylcarnitine                             | 0.870        | 1.011                 | 1.266        |
| Dodecanoylcarnitine                           | 0.976        | 1.292                 | 1.192        |
| Tetradecanoylcarnitine                        | 1.034        | 1.163                 | 1.106        |
| Tetradecenoylcarnitine                        | 1.044        | 1.131                 | 1.109        |
| Hexadecanoylcarnitine                         | 0.882        | 0.968                 | 1.013        |
| Hexadecenoylcarnitine                         | 0.963        | 1.117                 | 1.070        |
| Stearoylcarnitine                             | 0.667        | 0.592                 | 0.760        |
| Oleoylcarnitine                               | 0.864        | 0.975                 | 0.958        |

124

125 **Carnitine**

126  $F(2,6) = 5.4565; p = 0.0446$

|            |                       | <i>p</i> value |
|------------|-----------------------|----------------|
| Paclitaxel | Phyxol                | 0.0970         |
| Paclitaxel | Abraxane <sup>®</sup> | 0.0481         |
| Phyxol     | Abraxane <sup>®</sup> | 0.8458         |

127

128 **Acetylcarnitine**

129  $F(2,6) = 5.7663; p = 0.0401$

|            |                       | <i>p</i> value |
|------------|-----------------------|----------------|
| Paclitaxel | Phyxol                | 0.2442         |
| Paclitaxel | Abraxane <sup>®</sup> | 0.0337         |
| Phyxol     | Abraxane <sup>®</sup> | 0.3230         |

130

131 **Propionylcarnitine**

132  $F(2,6) = 5.1327; p = 0.0502$

133

134 **Iso-/Butyrylcarnitine**

135  $F(2,6) = 13.2659; p = 0.0063$

|            |                       | <i>p</i> value |
|------------|-----------------------|----------------|
| Paclitaxel | Phyxol                | 0.8262         |
| Paclitaxel | Abraxane <sup>®</sup> | 0.0077         |
| Phyxol     | Abraxane <sup>®</sup> | 0.0145         |

136

137 **Isovaleryl-/2-Methylbutyryl-/Valerylcarnitine**

138  $F(2,6) = 13.9254; p = 0.0056$

|            |                       | <i>p</i> value |
|------------|-----------------------|----------------|
| Paclitaxel | Phyxol                | 0.2069         |
| Paclitaxel | Abraxane <sup>®</sup> | 0.0047         |
| Phyxol     | Abraxane <sup>®</sup> | 0.0388         |

139

140 **Tiglylcarnitine**

141  $F(2,6) = 7.0988; p = 0.0262$

|            |                       | <i>p</i> value |
|------------|-----------------------|----------------|
| Paclitaxel | Phyxol                | 0.5060         |
| Paclitaxel | Abraxane <sup>®</sup> | 0.0238         |
| Phyxol     | Abraxane <sup>®</sup> | 0.1009         |

142

143 **Hexanoylcarnitine**

144  $F(2,6) = 10.9949; p = 0.0099$

|            |                       | <i>p</i> value |
|------------|-----------------------|----------------|
| Paclitaxel | Phyxol                | 0.0150         |
| Paclitaxel | Abraxane <sup>®</sup> | 0.0163         |
| Phyxol     | Abraxane <sup>®</sup> | 0.9966         |

145

146 **Octanoylcarnitine**

147  $F(2,6) = 31.2535; p = 0.0007$

|            |                       | <i>p</i> value |
|------------|-----------------------|----------------|
| Paclitaxel | Phyxol                | 0.0009         |
| Paclitaxel | Abraxane <sup>®</sup> | 0.7336         |
| Phyxol     | Abraxane <sup>®</sup> | 0.0016         |

148

149 **Decanoylcarnitine**

150  $F(2,6) = 0.4174; p = 0.6765$

151

152 **Dodecanoylcarnitine**

153  $F(2,6) = 0.5466; p = 0.6053$

154

155 **Tetradecanoylcarnitine**

156  $F(2,6) = 2.8877; p = 0.1323$

157

158 **Tetradecenoylcarnitine**

159  $F(2,6) = 2.5616; p = 0.1570$

160

161 **Hexadecanoylcarnitine**

162  $F(2,6) = 4.4704; p = 0.0648$

163

164 **Hexadecenoylcarnitine**

165  $F(2,6) = 4.2315; p = 0.0714$

166

167 **Stearoylcarnitine**

168  $F(2,6) = 13.7541; p = 0.0057$

|            |                       | <i>p</i> value |
|------------|-----------------------|----------------|
| Paclitaxel | Phyxol                | 0.0051         |
| Paclitaxel | Abraxane <sup>®</sup> | 0.0315         |
| Phyxol     | Abraxane <sup>®</sup> | 0.2818         |

169

170 **Oleoylcarnitine**

171  $F(2,6) = 5.9958; p = 0.0371$



|            |                       |                |
|------------|-----------------------|----------------|
|            |                       | <i>p</i> value |
| Paclitaxel | Phyxol                | 0.0432         |
| Paclitaxel | Abraxane <sup>®</sup> | 0.0730         |
| Phyxol     | Abraxane <sup>®</sup> | 0.9070         |

172

173 **Data for Fig 3**

174 (A)

175 Fold changes relative to the control group in the levels of long-chain and very long-

176 chain fatty acids of undifferentiated SH-SY5Y cells treated with 100 nM of paclitaxel

177 (in dimethyl sulfoxide), Phyxol, or Abraxane<sup>®</sup> for 24 hours.

178

|                  | Paclitaxel            |              |              |
|------------------|-----------------------|--------------|--------------|
|                  | Experiment 1          | Experiment 2 | Experiment 3 |
| Myristic acid    | 0.777                 | 0.949        | 0.930        |
| Palmitic acid    | 0.916                 | 1.066        | 0.893        |
| Palmitoleic acid | 0.895                 | 0.911        | 0.839        |
| Stearic acid     | 0.881                 | 1.059        | 0.952        |
| Oleic acid       | 0.748                 | 0.899        | 0.830        |
| Linoleic acid    | 0.713                 | 0.898        | 0.794        |
| Eicosanoic acid  | 0.896                 | 1.073        | 0.983        |
|                  | Phyxol                |              |              |
|                  | Experiment 1          | Experiment 2 | Experiment 3 |
| Myristic acid    | 0.825                 | 0.851        | 0.903        |
| Palmitic acid    | 1.103                 | 1.059        | 1.121        |
| Palmitoleic acid | 0.980                 | 1.018        | 1.029        |
| Stearic acid     | 1.117                 | 1.101        | 1.199        |
| Oleic acid       | 0.876                 | 0.915        | 1.048        |
| Linoleic acid    | 0.997                 | 0.993        | 1.026        |
| Eicosanoic acid  | 0.994                 | 1.105        | 1.020        |
|                  | Abraxane <sup>®</sup> |              |              |

|                  | Experiment 1 | Experiment 2 | Experiment 3 |
|------------------|--------------|--------------|--------------|
| Myristic acid    | 1.064        | 1.076        | 1.067        |
| Palmitic acid    | 1.346        | 1.212        | 1.228        |
| Palmitoleic acid | 1.141        | 1.171        | 1.258        |
| Stearic acid     | 1.206        | 1.081        | 1.187        |
| Oleic acid       | 0.987        | 0.930        | 1.005        |
| Linoleic acid    | 1.352        | 1.136        | 1.241        |
| Eicosanoic acid  | 1.164        | 1.238        | 1.262        |

179

180 **Myristic acid**

181  $F(2,6) = 11.1640; p = 0.0095$

|            |                       | <i>p</i> value |
|------------|-----------------------|----------------|
| Paclitaxel | Phyxol                | 0.8573         |
| Paclitaxel | Abraxane <sup>®</sup> | 0.0210         |
| Phyxol     | Abraxane <sup>®</sup> | 0.0116         |

182

183 **Palmitic acid**

184  $F(2,6) = 13.6140; p = 0.0059$

|            |                       | <i>p</i> value |
|------------|-----------------------|----------------|
| Paclitaxel | Phyxol                | 0.1260         |
| Paclitaxel | Abraxane <sup>®</sup> | 0.0048         |
| Phyxol     | Abraxane <sup>®</sup> | 0.0636         |

185

186 **Palmitoleic acid**

187  $F(2,6) = 37.5968; p = 0.0004$

|            |                       | <i>p</i> value |
|------------|-----------------------|----------------|
| Paclitaxel | Phyxol                | 0.0277         |
| Paclitaxel | Abraxane <sup>®</sup> | 0.0003         |

|        |                       |        |
|--------|-----------------------|--------|
| Phyxol | Abraxane <sup>®</sup> | 0.0055 |
|--------|-----------------------|--------|

188

189 **Stearic acid**

190  $F(2,6) = 6.7109; p = 0.0295$

|            |                       | <i>p</i> value |
|------------|-----------------------|----------------|
| Paclitaxel | Phyxol                | 0.0544         |
| Paclitaxel | Abraxane <sup>®</sup> | 0.0368         |
| Phyxol     | Abraxane <sup>®</sup> | 0.9454         |

191

192 **Oleic acid**

193  $F(2,6) = 3.6412; p = 0.0922$

194

195 **Linoleic acid**

196  $F(2,6) = 21.3451; p = 0.0019$

|            |                       | <i>p</i> value |
|------------|-----------------------|----------------|
| Paclitaxel | Phyxol                | 0.0537         |
| Paclitaxel | Abraxane <sup>®</sup> | 0.0015         |
| Phyxol     | Abraxane <sup>®</sup> | 0.0291         |

197

198 **Eicosanoic acid**

199  $F(2,6) = 9.9750; p = 0.0124$

|            |                       | <i>p</i> value |
|------------|-----------------------|----------------|
| Paclitaxel | Phyxol                | 0.6035         |
| Paclitaxel | Abraxane <sup>®</sup> | 0.0125         |
| Phyxol     | Abraxane <sup>®</sup> | 0.0391         |

200

201 **(B)**

202 Fold changes relative to the control group in the levels of long-chain and very long-

203 chain fatty acids of differentiated SH-SY5Y cells treated with 100 nM of paclitaxel

204 (in dimethyl sulfoxide), Phyxol, or Abraxane<sup>®</sup> for 24 hours.

205

|                    | Paclitaxel            |              |              |
|--------------------|-----------------------|--------------|--------------|
|                    | Experiment 1          | Experiment 2 | Experiment 3 |
| Palmitic acid      | 1.121                 | 1.132        | 1.264        |
| Stearic acid       | 1.104                 | 0.952        | 1.114        |
| Oleic acid         | 1.176                 | 1.165        | 1.272        |
| Linoleic acid      | 0.982                 | 0.992        | 1.156        |
| Eicosanoic acid    | 1.048                 | 1.100        | 1.223        |
| Tetracosanoic acid | 1.089                 | 1.095        | 1.236        |
| Hexacosanoic acid  | 1.171                 | 1.252        | 1.291        |
|                    | Phyxol                |              |              |
|                    | Experiment 1          | Experiment 2 | Experiment 3 |
| Palmitic acid      | 1.074                 | 1.187        | 1.220        |
| Stearic acid       | 1.158                 | 1.002        | 1.141        |
| Oleic acid         | 1.083                 | 1.043        | 1.217        |
| Linoleic acid      | 0.930                 | 1.004        | 1.071        |
| Eicosanoic acid    | 1.146                 | 1.085        | 1.030        |
| Tetracosanoic acid | 0.940                 | 0.996        | 1.033        |
| Hexacosanoic acid  | 0.995                 | 1.141        | 1.161        |
|                    | Abraxane <sup>®</sup> |              |              |
|                    | Experiment 1          | Experiment 2 | Experiment 3 |
| Palmitic acid      | 1.274                 | 1.294        | 1.180        |
| Stearic acid       | 1.148                 | 1.047        | 1.005        |
| Oleic acid         | 1.228                 | 1.128        | 1.088        |
| Linoleic acid      | 1.012                 | 1.041        | 0.908        |
| Eicosanoic acid    | 1.173                 | 1.255        | 1.107        |

|                    |       |       |       |
|--------------------|-------|-------|-------|
| Tetracosanoic acid | 1.199 | 1.112 | 1.129 |
| Hexacosanoic acid  | 1.132 | 1.176 | 1.059 |

206

207 **Palmitic acid**

208  $F(2,6) = 1.3149; p = 0.3361$

209

210 **Stearic acid**

211  $F(2,6) = 0.2238; p = 0.8059$

212

213 **Oleic acid**

214  $F(2,6) = 1.0891; p = 0.3949$

215

216 **Linoleic acid**

217  $F(2,6) = 0.3994; p = 0.6873$

218

219 **Eicosanoic acid**

220  $F(2,6) = 1.1224; p = 0.3854$

221

222 **Tetracosanoic acid**

223  $F(2,6) = 6.3065; p = 0.0335$

|            |                       |                |
|------------|-----------------------|----------------|
|            |                       | <i>p</i> value |
| Paclitaxel | Phyxol                | 0.0541         |
| Paclitaxel | Abraxane <sup>®</sup> | 0.9895         |
| Phyxol     | Abraxane <sup>®</sup> | 0.0456         |

224

225 **Hexacosanoic acid**

226  $F(2,6) = 3.2233; p = 0.1120$

227

228 **Data for Fig 4**

229 (A)

230 Fold changes in the medium-chain acyl-CoA dehydrogenase (MCAD) protein level

231 relative to control (relative expression normalized to cyclophilin A) in

232 undifferentiated SH-SY5Y cells treated with 100 nM of paclitaxel (in dimethyl

233 sulfoxide), Phyxol, or Abraxane<sup>®</sup> for 24 hours

234

| Paclitaxel (Samples 1-6) | Phyxol (Samples 1-6) | Abraxane <sup>®</sup> (Samples 1-6) |
|--------------------------|----------------------|-------------------------------------|
| 1.144                    | 0.941                | 1.066                               |
| 1.049                    | 0.870                | 1.130                               |
| 0.924                    | 0.918                | 0.979                               |
| 0.977                    | 0.915                | 1.120                               |
| 1.052                    | 0.811                | 0.921                               |
| 1.033                    | 0.823                | 0.982                               |

235  $F(2,15) = 8.8081; p = 0.0030$

|            |                       |                |
|------------|-----------------------|----------------|
|            |                       | <i>p</i> value |
| Paclitaxel | Phyxol                | 0.0070         |
| Paclitaxel | Abraxane <sup>®</sup> | 0.9972         |

|        |                       |        |
|--------|-----------------------|--------|
| Phyxol | Abraxane <sup>®</sup> | 0.0061 |
|--------|-----------------------|--------|

236

237 **(B)**

238 Fold changes in the medium-chain acyl-CoA dehydrogenase (MCAD) protein level

239 relative to control (relative expression normalized to cyclophilin A) in differentiated

240 SH-SY5Y cells treated with 100 nM of paclitaxel (in dimethyl sulfoxide), Phyxol, or

241 Abraxane<sup>®</sup> for 24 hours

242

| Paclitaxel (Samples 1-6) | Phyxol (Samples 1-6) | Abraxane <sup>®</sup> (Samples 1-6) |
|--------------------------|----------------------|-------------------------------------|
| 1.005                    | 0.883                | 1.056                               |
| 1.006                    | 0.921                | 1.015                               |
| 1.077                    | 0.963                | 0.990                               |
| 1.073                    | 0.833                | 1.069                               |
| 1.055                    | 0.924                | 1.029                               |
| 1.030                    | 0.793                | 1.065                               |

243  $F(2,15) = 23.2812; p = 0.00003$

|            |                       | <i>p</i> value |
|------------|-----------------------|----------------|
| Paclitaxel | Phyxol                | 0.0001         |
| Paclitaxel | Abraxane <sup>®</sup> | 0.9889         |
| Phyxol     | Abraxane <sup>®</sup> | 0.0001         |

244
